# Supplementary material for: Global burden of multiple sclerosis and its attributable risk factors, 1990–2019
Source: Frontiers journal article supplement (doi:10.3389/fneur.2024.1448377), 2024-10-25

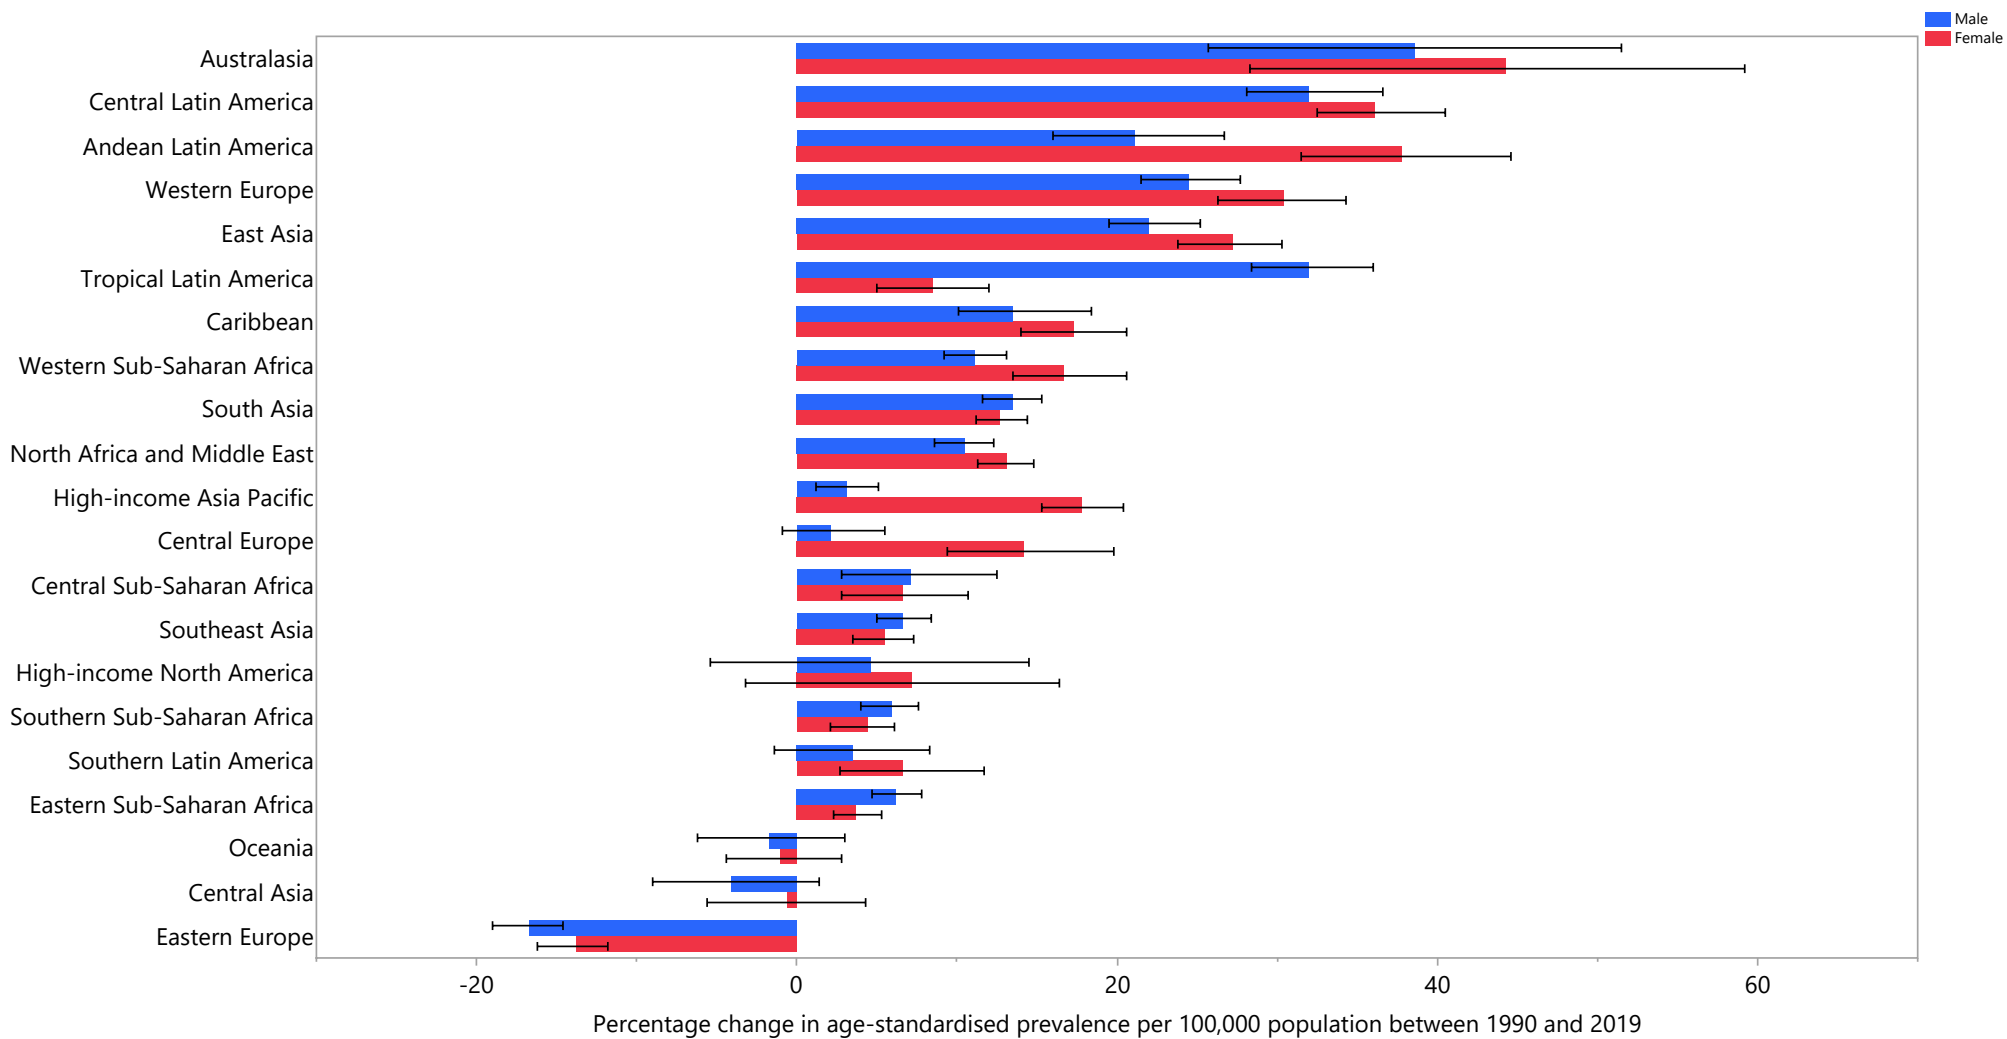

Supplement: Data_Sheet_3.PDF [file Data_Sheet_3.PDF]
